# Supplementary material for: Green-light ionization of 3-aminoperylene in SDS micelles—a promising access to hydrated electrons despite a myth debunked
Source: Royal Society of Chemistry journal article supplement (doi:10.1039/c6pp00403b), 2016-12-06
Supplement: c6pp00403b1.pdf [file c6pp00403b1.pdf]

Electronic supplementary information for

## Green-light ionization of 3-aminoperylene in SDS micelles — a promising access to hydrated electrons despite a myth debunked

*By Tim Kohlmann, Robert Naumann, Christoph Kerzig and Martin Goez\**

### 1 Experimental details

#### 1.1 General

We synthesized 3-aminoperylene **PerNH<sub>2</sub>** according to the procedure described in the literature,<sup>[1]</sup> via nitration of perylene followed by reduction of the obtained 3-nitroperylene by hydrazine with palladium on carbon as catalyst, and stored it under argon at  $-20\text{ }^{\circ}\text{C}$  in the dark. IR  $\tilde{\nu}$  in  $\text{cm}^{-1}$ : 1617 (m), 1566 (m), 1520 (m), 1498 (m), 1453 (m), 1386 (m), 1327 (m), 1266 (m), 1187 (m), 1015 (w), 892 (m), 825 (s), 804 (vs), 756 (vs).  $^{13}\text{C}$ -NMR  $\delta(\text{DMSO } d_6)$  in ppm: 146.0, 135.1, 132.8, 131.8, 131.0, 129.4, 128.2, 127.6, 127.4, 127.0, 125.1, 124.9, 123.3, 123.2, 123.1, 121.4, 119.9, 118.5, 117.6, 109.3. The  $^1\text{H}$ -NMR data and the UV-VIS absorption maxima in cyclohexane, acetonitrile and dimethylformamide were identical to the published values.<sup>[2,3]</sup>

The chemicals for this synthesis (Roth: perylene,  $\geq 99\%$ ; acetic anhydride,  $\geq 99\%$ ; sulfuric acid, 98 % nitric acid,  $\geq 65\%$  p.a.; Sigma-Aldrich: hydrazine monohydrate, 98 % and palladium 10 wt. % on activated carbon) as well as all chemicals for the photochemical experiments (sodium dodecyl sulfate, different manufacturers,  $\geq 99.5\%$  or better; sodium ascorbate,  $\geq 99\%$ , Roth; 6-*O*-palmitoyl-L-ascorbic acid,  $\geq 99\%$ , Sigma-Aldrich; sodium hydrogen phosphate dihydrate,  $\geq 99\%$ , Fluka; sodium dihydrogen phosphate dihydrate,  $> 98\%$ , VEB Laborchemie Apolda; sodium hydroxide,  $> 98\%$ , Sigma-Aldrich; fluorescein sodium, BioReagent, Fluka; *N,N*-dimethyl-3-nitro-aniline, 98 %, Alfa Aesar) were obtained in the highest available purity and used as received. The solvent for all photochemical experiments was ultrapure Millipore Milli-Q water (specific resistance,  $18.2\text{ M}\Omega\text{ cm}$ ). The solutions were deoxygenated with argon or  $\text{N}_2\text{O}$ , both of purity 5.0 and obtained from AirLiquide. Measurements at pH 8 were carried out in 6.7 mM dihydrogen phosphate / hydrogen phosphate buffer whereas for the experiments in more basic medium the pH was adjusted with sodium hydroxide.

#### 1.2 Cyclic voltammetry

Cyclic voltammetry was carried out with an AUT 72615 Metrohm potentiostat (software Nova 1.10). A 2 mm polished platinum disc and a platinum wire served as working and

---

\*Prof. Dr. Martin Goez, Tim Kohlmann, Robert Naumann, Christoph Kerzig, Martin-Luther-Universität Halle-Wittenberg, Institut für Chemie, Kurt-Mothes-Str. 2, D-06120 Halle (Saale), Germany. E-mail: martin.goez@chemie.uni-halle.de

counter electrodes. The reference was ferrocene/ferrocenium. The solvent acetonitrile was dried over 3 Å molecular sieve. The solutions contained 0.1 M tetraethylammonium tetrafluoroborate as conductive salt and 1 mM **PerNH<sub>2</sub>**; they were degassed with nitrogen before the measurements.

### 1.3 Photophysical experiments

Steady-state absorption and fluorescence spectra were recorded using a Shimadzu UV-2102 and a Perkin-Elmer LS 50B spectrometer. *N, N*-dimethyl-3-nitro-aniline was employed as reference<sup>[4]</sup> to correct for the wavelength-dependent sensitivity of the fluorescence spectrometer, and the fluorescence quantum yields were determined against fluorescein as standard.<sup>[5]</sup>

### 1.4 Quantum-mechanical computations

The transitions in Figure 4a of the main article were calculated by time-dependent DFT with the Gaussian 09 package,<sup>[6]</sup> using the B3LYP functional,<sup>[7]</sup> the 6-311++G(2d,2p) basis set, and as solvation model IEFPCM<sup>[8]</sup> with the solvent methanol. Methanol has almost the same polarity as experienced by the first excited singlet state of **PerNH<sub>2</sub>** in an SDS micelle (see, Figure 2b of the main article). Besides, recalculations in the solvent dimethyl sulfoxide — to take into account a possible displacement of the radical cation towards the more polar Stern layer of the micelle — gave practically no difference for these two transitions.

### 1.5 Laser flash photolysis

The home-made laser-flash photolysis setup has been described elsewhere.<sup>[9]</sup> Briefly, excitation is performed by a frequency-doubled (532 nm) or frequency-tripled (355 nm) Nd:YAG laser (pulse width, *ca* 5 ns) with (variable) very high intensities. Collimated beams and optically thin solutions ensure homogeneous excitation of the observed volume, and a motor-driven syringe pump that is activated between flashes serves to avoid a depletion of the reactants or accumulation of products in the course of a measurement. Absorption or luminescence are detected at right angles to the excitation beam with a time-resolution down to 1 ns. Optical path lengths, 2 mm (excitation) and 4 mm (detection).

## Supplementary References

- [1] Y.-J. Pu, M. Higashidate, K. Nakayama and J. Kido, *J. Mater. Chem.*, 2008, **18**, 4183–4188.
- [2] J. J. Looker, *J. Org. Chem.*, 1972, **37**, 3379–3381.
- [3] O. F. Mohammed and E. Vauthey, *Chem. Phys. Letters*, 2010, **487**, 246–250.
- [4] K. Suzuki, A. Kobayashi, S. Kaneko, K. Takehira, T. Yoshihara, H. Ishida, Y. Shiina, S. Oishia and S. Tobita, *Phys. Chem. Chem. Phys.*, 2009, **1**, 9850–9860.

- [5] G. Weber and F. Teale, *Trans. Faraday Soc.*, 1958, **54**, 640–648.
- [6] M. J. Frisch, G. W. Trucks, H. B. Schlegel, G. E. Scuseria, M. A. Robb, J. R. Cheeseman, G. Scalmani, V. Barone, B. Mennucci, G. A. Petersson, H. Nakatsuji, M. Caricato, X. Li, H. P. Hratchian, A. F. Izmaylov, J. Bloino, G. Zheng, J. L. Sonnenberg, M. Hada, M. Ehara, K. Toyota, R. Fukuda, J. Hasegawa, M. Ishida, T. Nakajima, Y. Honda, O. Kitao, H. Nakai, T. Vreven, J. A. Montgomery, Jr., J. E. Peralta, F. Ogliaro, M. Bearpark, J. J. Heyd, E. Brothers, K. N. Kudin, V. N. Staroverov, R. Kobayashi, J. Normand, K. Raghavachari, A. Rendell, J. C. Burant, S. S. Iyengar, J. Tomasi, M. Cossi, N. Rega, J. M. Millam, M. Klene, J. E. Knox, J. B. Cross, V. Bakken, C. Adamo, J. Jaramillo, R. Gomperts, R. E. Stratmann, O. Yazyev, A. J. Austin, R. Cammi, C. Pomelli, J. W. Ochterski, R. L. Martin, K. Morokuma, V. G. Zakrzewski, G. A. Voth, P. Salvador, J. J. Dannenberg, S. Dapprich, A. D. Daniels, Ö. Farkas, J. B. Foresman, J. V. Ortiz, J. Cioslowski and D. J. Fox, *Gaussian 09 Revision A.1*, Gaussian Inc., Wallingford CT, 2009.
- [7] P. J. Stephens, F. J. Devlin, C. F. Chabalowski and M. J. Frisch, *J. Phys. Chem.*, 1994, **98**, 11623–11627.
- [8] J. Tomasi, B. Mennucci and R. Cammi, *Chem. Rev.*, 2005, **105**, 2999–3093.
- [9] C. Kerzig and M. Goez, *Chem. Sci.*, 2016, **7**, 3862–3868.
